# Supplementary material
Source: publisher figshare collection journal article supplement (https://tandf.figshare.com/ndownloader/files/37565068)
Supplement: Supplementary file 1 [file 37565068]

## Sheet: Data_Specimens
Repository	Specimen	Unit	Locality	Upper/Lower	Side	Element	IAP	IT	UTRL	P4L	P4W	M1L	M1W	M2L	M2W	M3L	M3W	iAP	iT	LTRL	m1L	m1W	m2L	m2W	m3L	m3W
UMPC	19555	M	C1717	L	L	i-m3												0.82	0.59		1.24	0.865	1.192	0.843	1.004	0.77
UMPC	1841		MV6504	L	L	m1															1.336	1.03
UMPC	2166	L	Ku-Mt-15	L	L	m1															1.321	0.983
UWBM	108091	L	C1707	L	L	m1															1.42	0.945
UMPC	19553	M	C1717	L	L	m1-3														3.341	1.002	0.804	1.15	0.88	1.202	0.863
KUVP	18226	M	C1704	L	L	m2																	1.401	1.064
KUVP	18694	M	C1704	L	L	m2																	1.497	1.147
KUVP	18801	M	C1711	L	L	m2																	1.233	1.162
UWBM	108048	L	C1721	L	L	m2																	1.396	1.101
UWBM	108553	L	C1721	L	L	m2																	1.328	1.021
UMPC	14022	L	MV6613	L	L	m2-3																	1.366	1.013	1.186	0.943
KUVP	23502	L	C1721	L	L	m2-m3																	1.166	0.967
KUVP	20512	M	C0174	L	L	m3																			1.153	1.024
UMPC	19554	M	C1717	L	R	i-m3												0.765	0.502		1.211	0.835	1.176	0.939	0.99	0.835
KUVP	18714	M	C1704	L	R	m1															1.26	0.89
KUVP	18717	M	C1704	L	R	m1															1.321	0.975
KUVP	23515	L	C1721	L	R	m1															1.365	0.992
KUVP	18008	M	C1704	L	R	m1-3													0.602	3.782	1.382	1.064	1.291	1.073	1.118	0.918
KUVP	18457	L	MV6613	L	R	m1-3														3.765	1.394	1.003	1.388	1.088	1.088	0.964
UMPC	19557	M	C1717	L	R	m1-3														3.344	1.156	0.81	1.136	0.88	1.024	0.888
KUVP	18737	M	C1704	L	R	m2																	1.343	1.033
KUVP	18741	M	C1704	L	R	m2																	1.301	0.946
UMPC	13991	U	C1712	L	R	m2																	1.198	0.951
KUVP	18225	M	C1704	L	R	m2-3																	1.331	0.951	1.227	0.899
UWBM	97487	L	C1721	L		m1															1.342	0.994
UMPC	2247	M	C1717	U	L	I-M3	1.091	0.525	3.419	0.496	0.663	1.135	1.061	1.081	1.022	0.879	0.889
KUVP	18488	U	C0173	U	L	M1						1.333	1.303
KUVP	18695	M	C1704	U	L	M1						1.3	1.066
KUVP	18696	M	C1704	U	L	M1						1.362	1.14
KUVP	18708	M	C1704	U	L	M1						1.408	1.136
KUVP	18718	M	C1704	U	L	M1						1.266	1.196
KUVP	18723	M	C1704	U	L	M1						1.328	1.222
KUVP	18726	M	C1704	U	L	M1						1.312	1.204
KUVP	18745	M	C1704	U	L	M1						1.289	1.262
KUVP	18799	M	C1711	U	L	M1						1.254	1.149
KUVP	20500	L	C1720	U	L	M1						1.187	1.033
KUVP	20507	M	C0174	U	L	M1						1.268	1.319
KUVP	20511	M	C0174	U	L	M1						1.344	1.291
UMPC	1464		MV6504	U	L	M1						1.364	1.263
UWBM	101374	L	C1721	U	L	M1						1.27	1.253
UWBM	108101	L	C1708	U	L	M1						1.269	1.157
UWBM	108555	M	C1702	U	L	M1						1.254	1.136
UWBM	108561	M	C0174	U	L	M1						1.378	1.277
UWBM	98604	M	C0174	U	L	M1-2						1.36	1.16	1.26	1.21
UWBM	98720	L	C1707	U	L	M1-2						1.31	1.23	1.26	1.28
KUVP	18692	M	C1704	U	L	M2								1.31	1.12
KUVP	18744	M	C1704	U	L	M2								1.253	1.253
KUVP	18783	M	C1711	U	L	M2								1.225	1.218
KUVP	18721	M	C1704	U	L	M3										0.961	0.984
KUVP	18760	M	C1704	U	L	M3										0.962	0.924
KUVP	18884	M	C1704	U	L	M3										0.978	0.963
KUVP	18885	M	C1704	U	L	M3										0.921	0.996
KUVP	18172	L	MV6554	U	L	P4-M1				0.7	0.722	1.301	1.229
KUVP	18846	L	MV6554	U	L	P4-M1				0.631	0.743	1.346	1.255
KUVP	20508	M	C0174	U	L	P4-M1				0.588	0.708	1.406	1.277
KUVP	23501	L	MV6554	U	L	P4-M1				0.577	0.645	1.283	1.107
UWBM	97502	M	C0174	U	L	P4-M1				0.537	0.645	1.343	1.252
UMPC	19552	M	C1717	U	L	P4-M3			3.383	0.509	0.614	1.144	1.194	1.042	1.018	0.749	0.818
UMPC	19556	M	C1717	U	R	I-M1	1.06	0.544		0.78	0.803	1.061	0.98
UMPC	2247	M	C1717	U	R	I-M2		0.52		0.66	0.66	1.126	1.084	1.08	1.058
KUVP	18233	M	C1704	U	R	M1						1.35	1.285
KUVP	18486	U	C0173	U	R	M1						1.275	1.22
KUVP	18697	M	C1704	U	R	M1						1.339	1.232
UWBM	98727	L	C1721	U	R	M1						1.33	1.226
UWBM	101305	L	C1721	U	R	M1						1.235	1.04
KUVP	18482	U	C0173	U	R	M2								1.259	1.192
KUVP	18491	U	C0173	U	R	M2								1.278	1.223
KUVP	18693	M	C1704	U	R	M2								1.265	1.109
KUVP	18716	M	C1704	U	R	M2								1.206	1.126
KUVP	18752	M	C1704	U	R	M2								1.219	1.174
UWBM	98682	L	C1707	U	R	M2								1.225	1.172
KUVP	18707	M	C1704	U	R	M3										0.997	0.879
KUVP	18730	M	C1704	U	R	M3										0.996	1.097
KUVP	18675	M	C0174	U	R	P4-M1				0.498	0.556	1.336	1.147
KUVP	20509	M	C0174	U	R	P4-M1				0.552	0.709	1.428	1.323
UMPC	19551	M	C1717	U	R	P4-M2				0.451	0.519	1.051	0.999	1.006	1.025
UMPC	13989	L	MV6613	U	R	P4-M2				0.537	0.7	1.29	1.222	1.248	1.248
KUVP	18007	M	C1704	U	R	P4-M3			3.989	0.513	0.651	1.334	1.277	1.259	1.24	0.996	1.002
